# Supplementary material for: Tuning conductivity and magnetism of CuFe2O4via cation redistribution
Source: Royal Society of Chemistry journal article supplement (doi:10.1039/c7ra01765k), 2017-01-01
Supplement: c7ra01765k1.pdf [file c7ra01765k1.pdf]

## Supplementary Information

### Tuning conductivity and magnetism of $\text{CuFe}_2\text{O}_4$ via cation redistribution

Ruyi Zhang,<sup>a</sup> Qibin Yuan,<sup>a</sup> Rong Ma,<sup>a</sup> Xiaoxing Liu,<sup>b</sup> Cunxu Gao,<sup>b</sup> Ming Liu,<sup>\*a</sup> Chun-Lin Jia,<sup>ac</sup> Hong Wang<sup>\*a</sup>

<sup>a</sup> School of Microelectronics & State Key Laboratory for Mechanical Behavior of Materials, Xi'an Jiaotong University, Xi'an 710049, China

<sup>b</sup> Key Lab for Magnetism and Magnetic Materials of the Ministry of Education, Lanzhou University, 730000 Lanzhou, China

<sup>c</sup> Peter Grünberg Institute, Forschungszentrum Jülich GmbH, 52425 Jülich, Germany

**Table S1** The refinement parameters for all CFO samples

| Sample                   | RQ/<br>SC-1000                                      | RQ-500                                              | RQ-700                                              | RQ-900                                              |
|--------------------------|-----------------------------------------------------|-----------------------------------------------------|-----------------------------------------------------|-----------------------------------------------------|
| Crystal system           | Tetragonal                                          | Tetragonal                                          | Cubic                                               | Cubic                                               |
| Space group              | I41/amd                                             | I41/amd                                             | Fd-3m                                               | Fd-3m                                               |
| Unit cell parameters     | a=b=5.832 Å<br>c=8.643 Å                            | a=b=5.882 Å<br>c=8.549 Å                            | a=b=c=8.394 Å                                       | a=b=c=8.389 Å                                       |
| R factors                | $R_{wp}=0.0717$<br>$R_p=0.0527$<br>$R_{exp}=0.0170$ | $R_{wp}=0.0271$<br>$R_p=0.0211$<br>$R_{exp}=0.0190$ | $R_{wp}=0.0117$<br>$R_p=0.0079$<br>$R_{exp}=0.0073$ | $R_{wp}=0.0073$<br>$R_p=0.0055$<br>$R_{exp}=0.0058$ |
| Atom Occupancy (Td site) | Cu: 0.1206<br>Fe: 0.8794                            | Cu: 0.1866<br>Fe: 0.8134                            | Cu: 0.2732<br>Fe: 0.7268                            | Cu: 0.3078<br>Fe: 0.6922                            |
| Atom Occupancy (Oh site) | Cu:0.4397<br>Fe:0.5603                              | Cu: 0.4067<br>Fe: 0.5933                            | Cu: 0.3634<br>Fe: 0.6366                            | Cu: 0.3461<br>Fe: 0.6539                            |

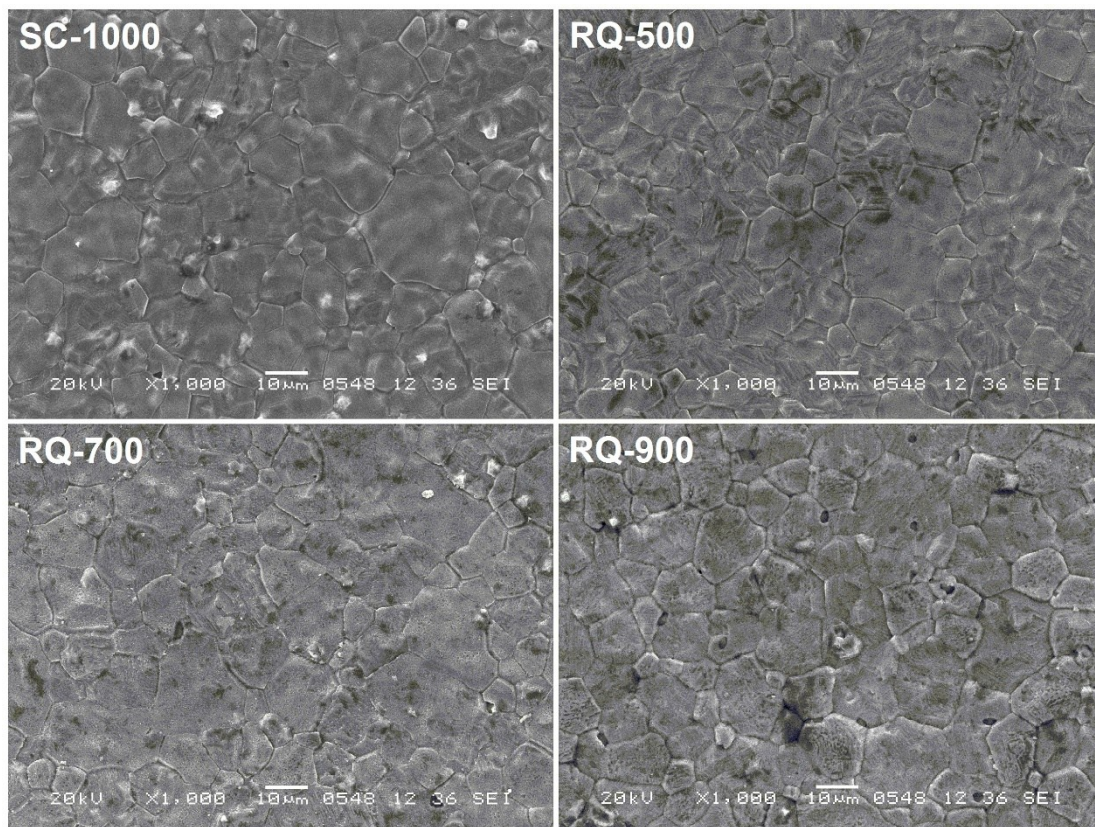

**Fig. S1** The SEM images for all CFO samples. The average grain sizes for the RQ-0, RQ-500, RQ-700, and RQ-900 are around 10.8  $\mu\text{m}$ , 11.6  $\mu\text{m}$ , 11.5  $\mu\text{m}$ , and 11.1  $\mu\text{m}$ , respectively.

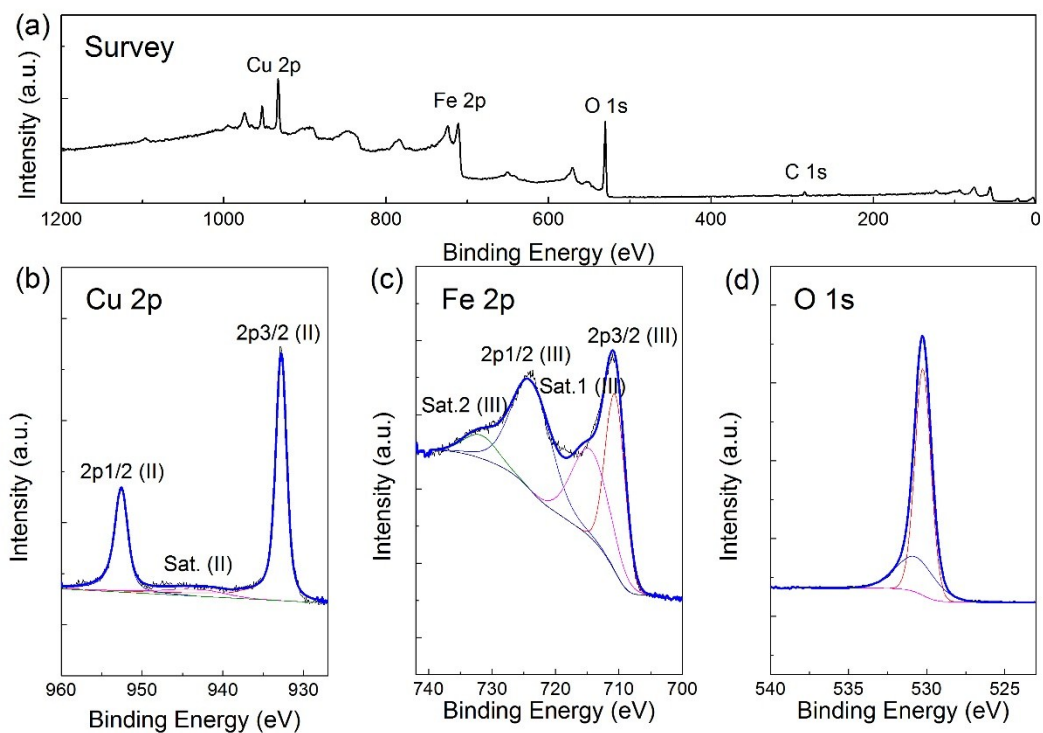

**Fig. S2** XPS Spectra for 900  $^{\circ}\text{C}$  quenched CFO samples. (a). Survey scan; (b) Cu 2p;

(c) Fe 2p; (d) O 1s. The XPS study shows the high temperature quenched CFO sample possess an almost ideal stoichiometry of 1:2:4 for the concentration of Cu, Fe, and O element. The core level peak fits indicate no  $\text{Cu}^+$  or  $\text{Fe}^{2+}$  ions form after performing rapid quenching process on CFO sample.
